# Supplementary material for: Net CO 2 fossil fuel emissions of Tokyo estimated directly from measurements of the Tsukuba TCCON site and radiosondes
Source: Copernicus journal article supplement (doi:10.5194/amt-13-2697-2020), 2020-05-27

# Residuals by wind direction and speed at the Tsukuba site (tk)

## Negative $\Delta XCO_2$ (y - fit)

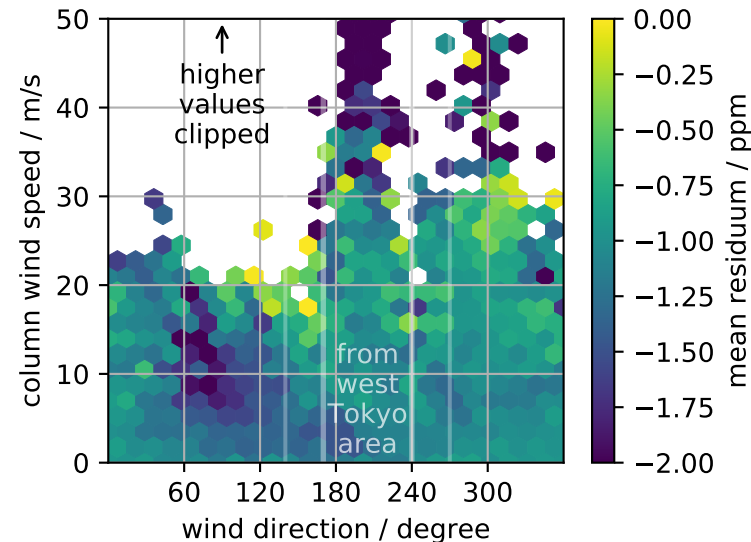

## Tokyo Area

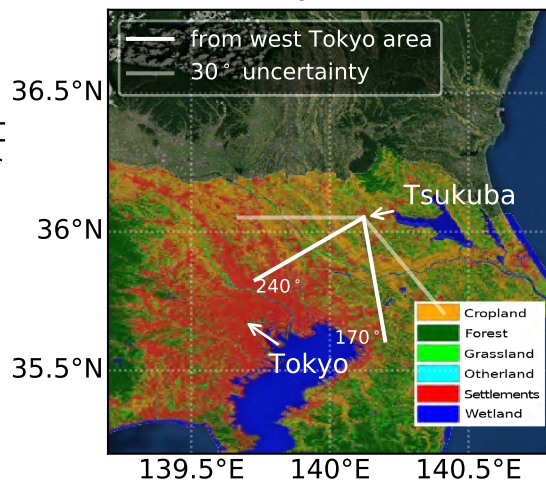

Surface type overlay from  
Bagan 2014, doi:10.1088/1748-9326/9/6/064015

## Positive $\Delta XCO_2$ (y - fit)

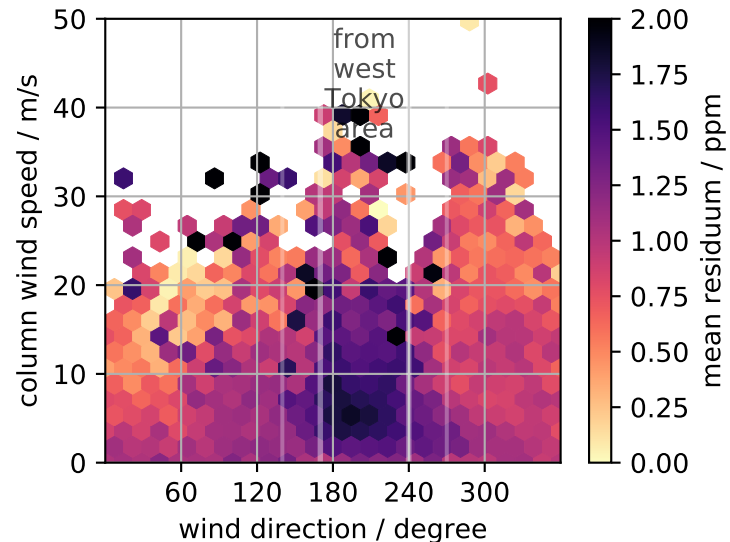

Supplement: Supplementary file 5 [file amt-13-2697-2020-supplement.zip]
