# Supplementary material for: Net CO 2 fossil fuel emissions of Tokyo estimated directly from measurements of the Tsukuba TCCON site and radiosondes
Source: Copernicus journal article supplement (doi:10.5194/amt-13-2697-2020), 2020-05-27
Supplement: Supplementary file 9 [file amt-13-2697-2020-supplement.zip]

Trajectory Direction: Forward      Duration: 15 hrs  
Vertical Motion Calculation Method:      Model Vertical Velocity  
Meteorology: 0000Z 30 Jun 2017 - GFS
