# Supplementary material for: Net CO 2 fossil fuel emissions of Tokyo estimated directly from measurements of the Tsukuba TCCON site and radiosondes
Source: Copernicus journal article supplement (doi:10.5194/amt-13-2697-2020), 2020-05-27
Supplement: Supplementary file 13 [file amt-13-2697-2020-supplement.zip]

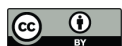

## *Supplement of*

# **Net CO<sub>2</sub> fossil fuel emissions of Tokyo estimated directly from measurements of the Tsukuba TCCON site and radiosondes**

**Arne Babenhauserheide et al.**

*Correspondence to:* Arne Babenhauserheide (arne\_bab@web.de)

- amt-13-2697-2020-supplement-title-page.pdf
- main-files
  - emissions-tokyo-auxiliary.pdf
  - plot\_tcon\_by\_direction\_cleaned.py
- support-files
  - Makefile
  - README
  - average\_sounding\_data.py
  - ccgfilt-daily-cycle-corrected-residuals-daily-start-170-stop-240-xco2.pdf
  - ccgfilt-daily-cycle-uncorrected-residuals-daily-start-170-stop-240-xco2.pdf
  - ccgfilt.py
  - copernicus.bst
  - copernicus.cfg
  - copernicus.cls
  - emissions-tokyo-auxiliary.pdf
  - emissions-tokyo-auxiliary.tex
  - emissions-tokyo.tex
  - hasi-yamagata-2014-doi-10\_1088-1748-9326-9-6-064015-cropped-34\_50-36\_20-138\_50-140\_50.png
  - hasi-yamagata-2014-doi-10\_1088-1748-9326-9-6-064015-cropped-34\_50-36\_20-138\_50-140\_50.xcf
  - hasi-yamagata-2014-doi-10\_1088-1748-9326-9-6-064015.ppm
  - hexbin-wind-speed-ccgfilt-xco2.pdf
  - natbib.sty
  - odia- emissions-by-angle.pdf
  - odia2016\_1km\_excl\_intl\_1101\_rev1.tokyo.tif

- odiac2016\_1km\_excl\_intl\_1102\_rev1.tokyo.tif
- odiac2016\_1km\_excl\_intl\_1103\_rev1.tokyo.tif
- odiac2016\_1km\_excl\_intl\_1104\_rev1.tokyo.tif
- odiac2016\_1km\_excl\_intl\_1105\_rev1.tokyo.tif
- odiac2016\_1km\_excl\_intl\_1106\_rev1.tokyo.tif
- odiac2016\_1km\_excl\_intl\_1107\_rev1.tokyo.tif
- odiac2016\_1km\_excl\_intl\_1108\_rev1.tokyo.tif
- odiac2016\_1km\_excl\_intl\_1109\_rev1.tokyo.tif
- odiac2016\_1km\_excl\_intl\_1110\_rev1.tokyo.tif
- odiac2016\_1km\_excl\_intl\_1111\_rev1.tokyo.tif
- odiac2016\_1km\_excl\_intl\_1112\_rev1.tokyo.tif
- odiac2016\_1km\_excl\_intl\_1201\_rev1.tokyo.tif
- odiac2016\_1km\_excl\_intl\_1202\_rev1.tokyo.tif
- odiac2016\_1km\_excl\_intl\_1203\_rev1.tokyo.tif
- odiac2016\_1km\_excl\_intl\_1204\_rev1.tokyo.tif
- odiac2016\_1km\_excl\_intl\_1205\_rev1.tokyo.tif
- odiac2016\_1km\_excl\_intl\_1206\_rev1.tokyo.tif
- odiac2016\_1km\_excl\_intl\_1207\_rev1.tokyo.tif
- odiac2016\_1km\_excl\_intl\_1208\_rev1.tokyo.tif
- odiac2016\_1km\_excl\_intl\_1209\_rev1.tokyo.tif
- odiac2016\_1km\_excl\_intl\_1210\_rev1.tokyo.tif
- odiac2016\_1km\_excl\_intl\_1211\_rev1.tokyo.tif
- odiac2016\_1km\_excl\_intl\_1212\_rev1.tokyo.tif
- odiac2016\_1km\_excl\_intl\_1301\_rev1.tokyo.tif
- odiac2016\_1km\_excl\_intl\_1302\_rev1.tokyo.tif
- odiac2016\_1km\_excl\_intl\_1303\_rev1.tokyo.tif
- odiac2016\_1km\_excl\_intl\_1304\_rev1.tokyo.tif
- odiac2016\_1km\_excl\_intl\_1305\_rev1.tokyo.tif
- odiac2016\_1km\_excl\_intl\_1306\_rev1.tokyo.tif
- odiac2016\_1km\_excl\_intl\_1307\_rev1.tokyo.tif
- odiac2016\_1km\_excl\_intl\_1308\_rev1.tokyo.tif
- odiac2016\_1km\_excl\_intl\_1309\_rev1.tokyo.tif
- odiac2016\_1km\_excl\_intl\_1310\_rev1.tokyo.tif
- odiac2016\_1km\_excl\_intl\_1311\_rev1.tokyo.tif
- odiac2016\_1km\_excl\_intl\_1312\_rev1.tokyo.tif
- odiac2016\_1km\_excl\_intl\_1401\_rev1.tokyo.tif
- odiac2016\_1km\_excl\_intl\_1402\_rev1.tokyo.tif
- odiac2016\_1km\_excl\_intl\_1403\_rev1.tokyo.tif
- odiac2016\_1km\_excl\_intl\_1404\_rev1.tokyo.tif
- odiac2016\_1km\_excl\_intl\_1405\_rev1.tokyo.tif
- odiac2016\_1km\_excl\_intl\_1406\_rev1.tokyo.tif
- odiac2016\_1km\_excl\_intl\_1407\_rev1.tokyo.tif

- odia2016\_1km\_excl\_intl\_1408\_rev1.tokyo.tif
- odia2016\_1km\_excl\_intl\_1409\_rev1.tokyo.tif
- odia2016\_1km\_excl\_intl\_1410\_rev1.tokyo.tif
- odia2016\_1km\_excl\_intl\_1411\_rev1.tokyo.tif
- odia2016\_1km\_excl\_intl\_1412\_rev1.tokyo.tif
- odia2016\_1km\_excl\_intl\_1501\_rev1.tokyo.tif
- odia2016\_1km\_excl\_intl\_1502\_rev1.tokyo.tif
- odia2016\_1km\_excl\_intl\_1503\_rev1.tokyo.tif
- odia2016\_1km\_excl\_intl\_1504\_rev1.tokyo.tif
- odia2016\_1km\_excl\_intl\_1505\_rev1.tokyo.tif
- odia2016\_1km\_excl\_intl\_1506\_rev1.tokyo.tif
- odia2016\_1km\_excl\_intl\_1507\_rev1.tokyo.tif
- odia2016\_1km\_excl\_intl\_1508\_rev1.tokyo.tif
- odia2016\_1km\_excl\_intl\_1509\_rev1.tokyo.tif
- odia2016\_1km\_excl\_intl\_1510\_rev1.tokyo.tif
- odia2016\_1km\_excl\_intl\_1511\_rev1.tokyo.tif
- odia2016\_1km\_excl\_intl\_1512\_rev1.tokyo.tif
- odia2016\_tokyo\_1km\_excl\_intl\_1101\_rev1.tif
- odia2016\_tokyo\_1km\_excl\_intl\_1501\_rev1.tif
- odia\_emissions.json
- odia\_emissions.py
- pdfscreen.sty
- pdfscreen.sty
- plot-tokyo-2015-01.pdf
- plot\_daytime\_vs\_direction.py
- plot\_odia.py
- plot\_tccon\_by\_direction.py
- plot\_tccon\_by\_direction\_cleaned.py
- ref.bib
- select\_measurements.py
- setupbody.tex
- tateno-sounding-profiles-boxplot-speed-and-direction.pdf
- tateno-sounding-profiles-boxplot.pdf
- tateno-wind-scaling-by-day.json
- tk20110804-20160330-public-fit-daily-xco2.pdf
- tk20110804-20160330-public-hexbin-wind-speed-xch4.pdf
- tk20110804-20160330-public-tsukuba-residuals-ccgfilt-xco2.pdf
- tk20110804\_20160330.public-fit-daily-xco2.pdf
- tk20110804\_20160330.public-fit-xco2.pdf
- tk20110804\_20160330.public-hexbin-wind-speed-xco2.pdf
- tk20110804\_20160330.public-tsukuba-residuals-ccgfilt-xco2.pdf
- tk20110804\_20160330.public-tsukuba-residuals-xco2.pdf

- tk20110804\_20160330.public-tsukuba-residualsxxch4.json
- tk20110804\_20160330.public-tsukuba-residualsxxco.json
- tk20110804\_20160330.public-tsukuba-residualsxxco2.json
- tokyo-5-hours-trajplot\_14938.pdf
- trajplot\_197390.pdf
- trajplot\_198071.pdf
- tsukuba-residuals.json
- tsukuba-wind-direction-vs-time-of-day.pdf

The copyright of individual parts of the supplement might differ from the CC BY 4.0 License.
