# Supplementary material for: Net CO 2 fossil fuel emissions of Tokyo estimated directly from measurements of the Tsukuba TCCON site and radiosondes
Source: Copernicus journal article supplement (doi:10.5194/amt-13-2697-2020), 2020-05-27

# NOAA HYSPLIT MODEL

## Forward trajectories starting at 1000 UTC 01 Jul 17

### 00 UTC 30 Jun GFSG Forecast Initialization

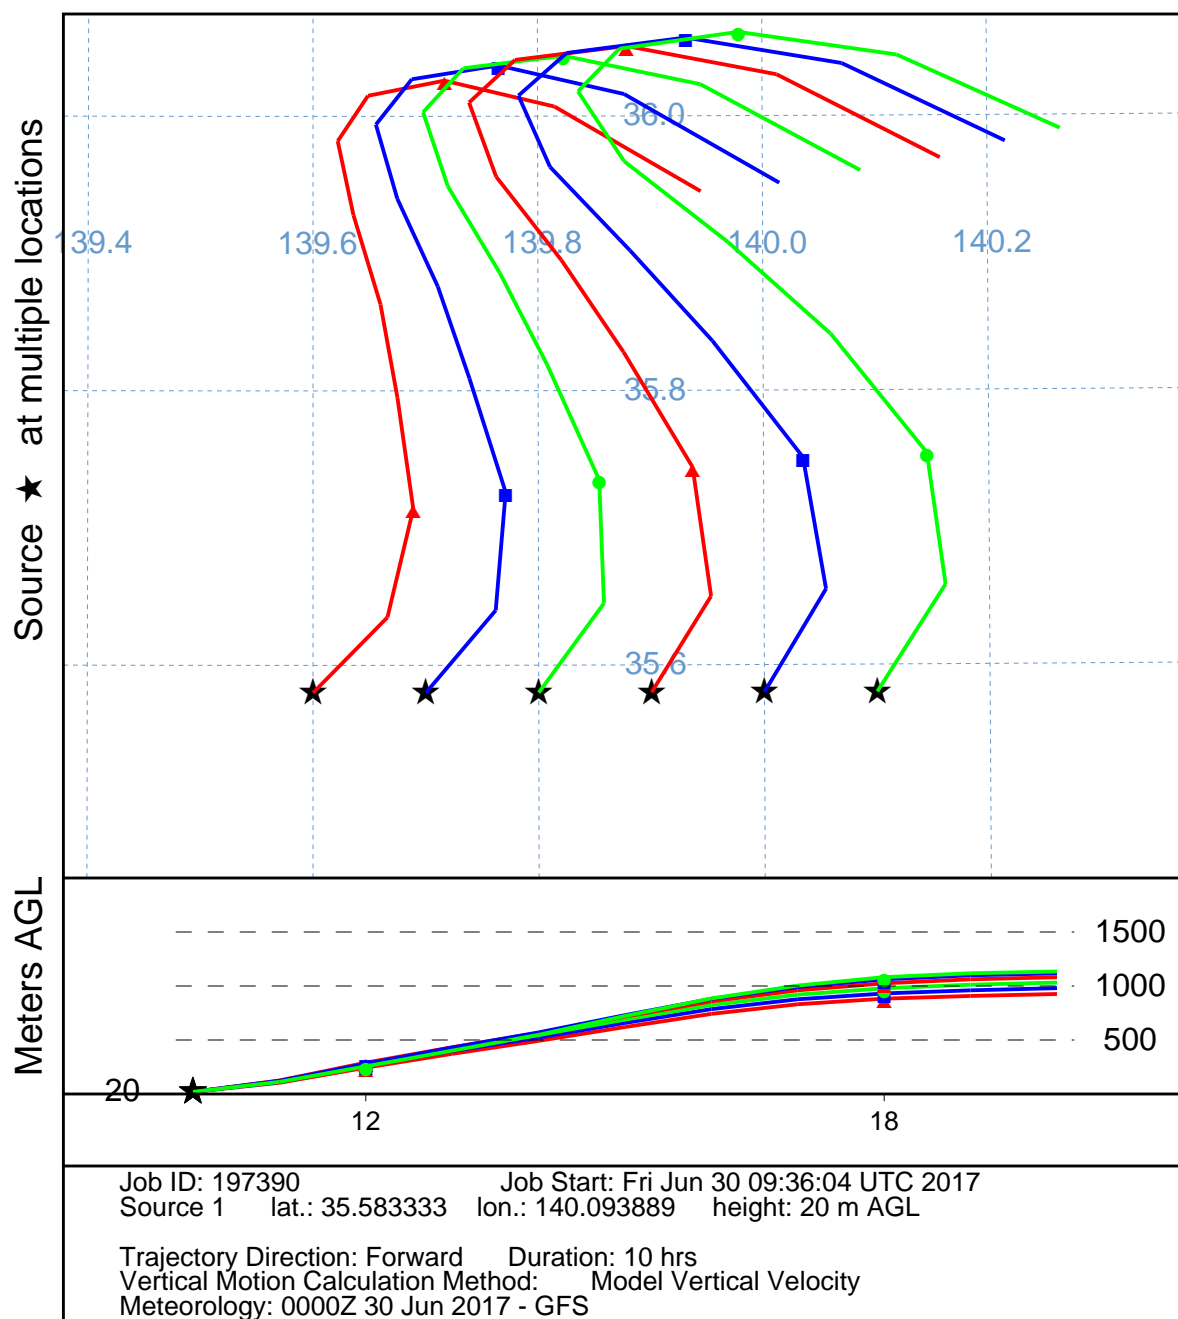

Supplement: Supplementary file 20 [file amt-13-2697-2020-supplement.zip]
