# Supplementary figures and images for: Net CO 2 fossil fuel emissions of Tokyo estimated directly from measurements of the Tsukuba TCCON site and radiosondes
Source: Copernicus journal article supplement (doi:10.5194/amt-13-2697-2020), 2020-05-27

# Average daily cycle in Tsukuba, Japan (tk)

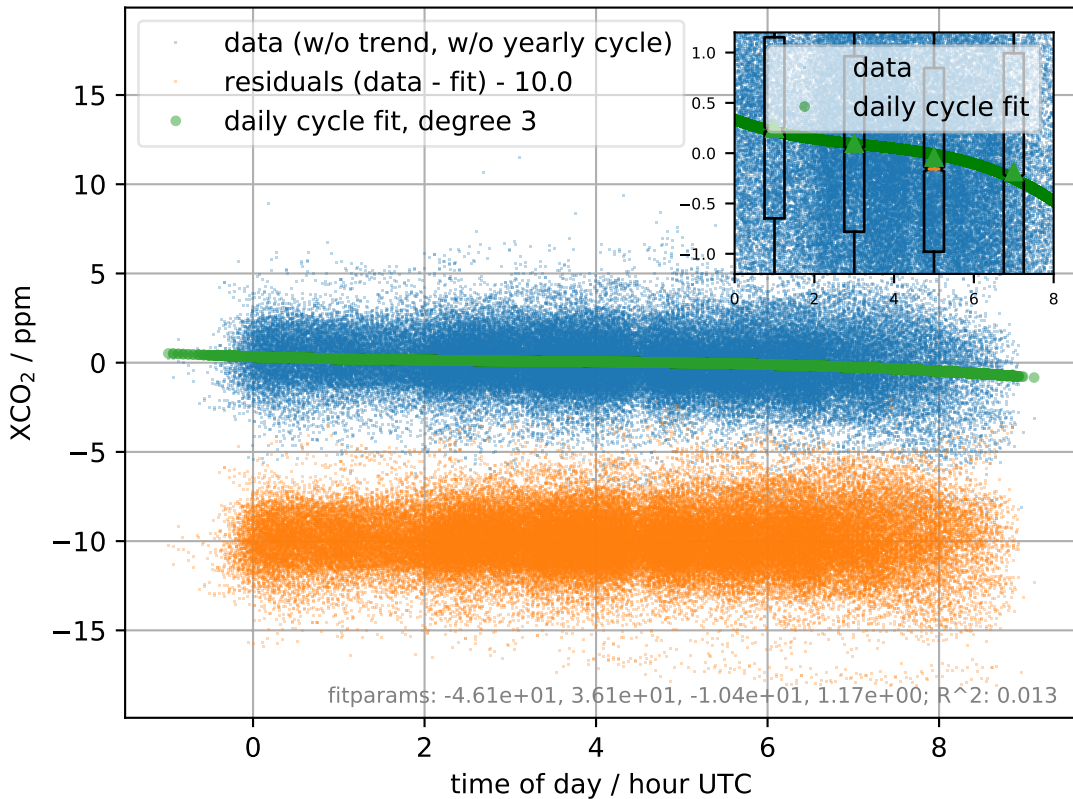

Supplement: Supplementary file 1 [file amt-13-2697-2020-supplement.zip]

Average daily cycle in Tsukuba, Japan (tk), by ccgfiltr, after correction

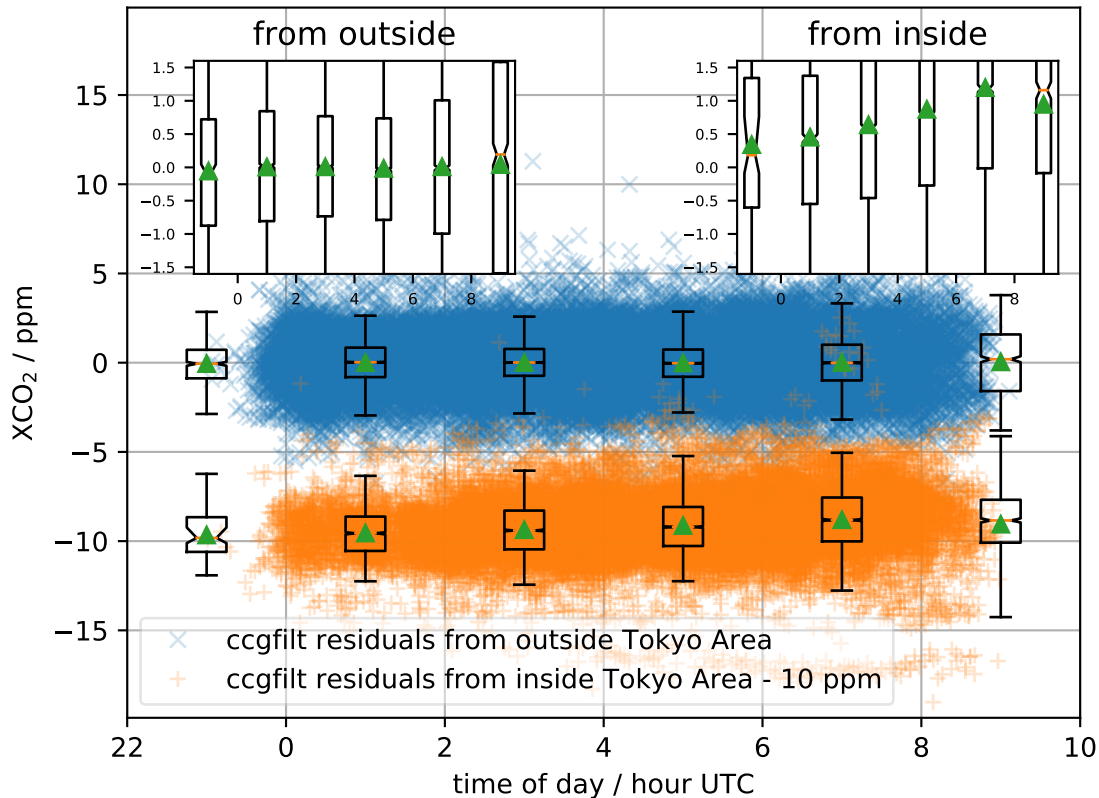

Supplement: Supplementary file 2 [file amt-13-2697-2020-supplement.zip]

# ODIAC emissions by wind direction

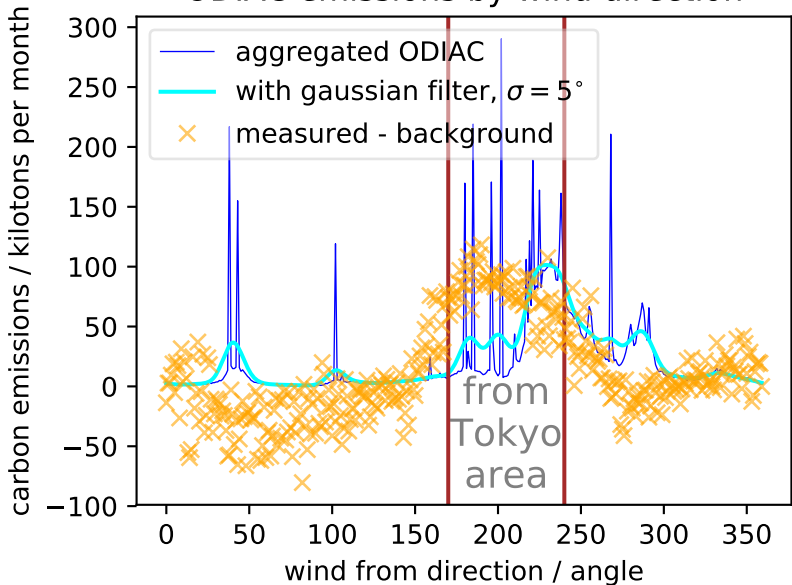

Supplement: Supplementary file 3 [file amt-13-2697-2020-supplement.zip]

Average daily cycle in Tsukuba, Japan (tk), by ccgfiltr

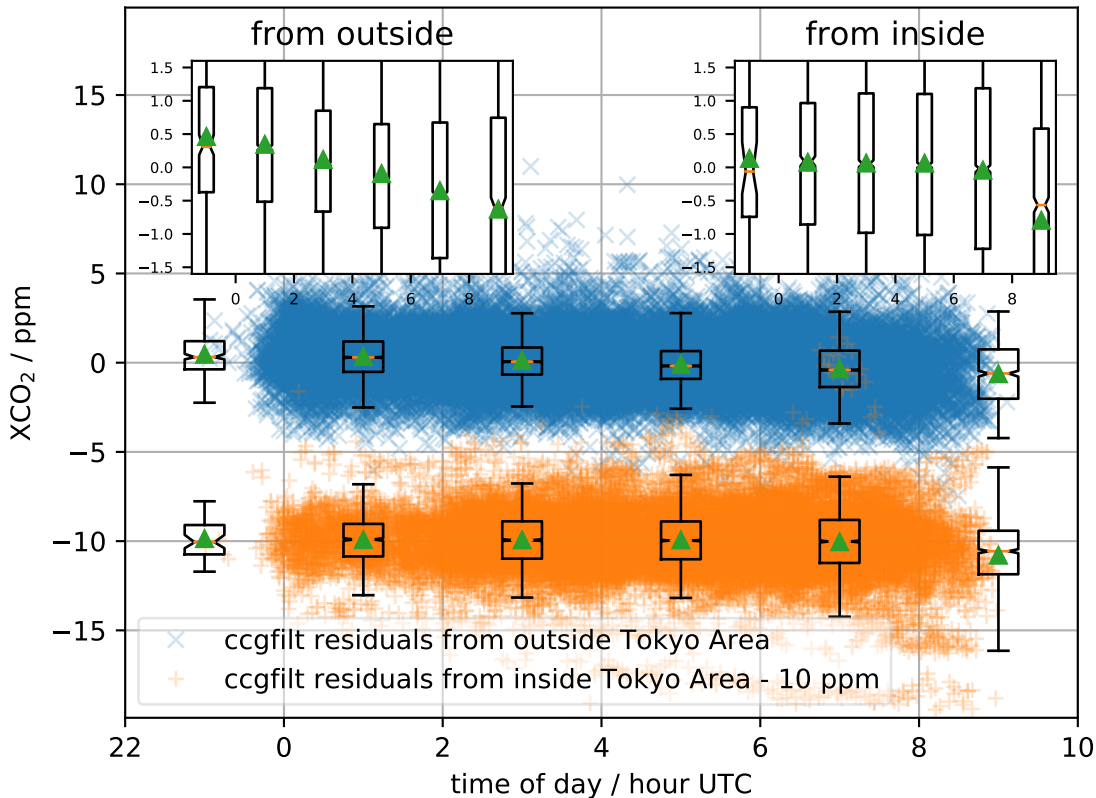

Supplement: Supplementary file 4 [file amt-13-2697-2020-supplement.zip]

# Average daily cycle in Tsukuba, Japan (tk)

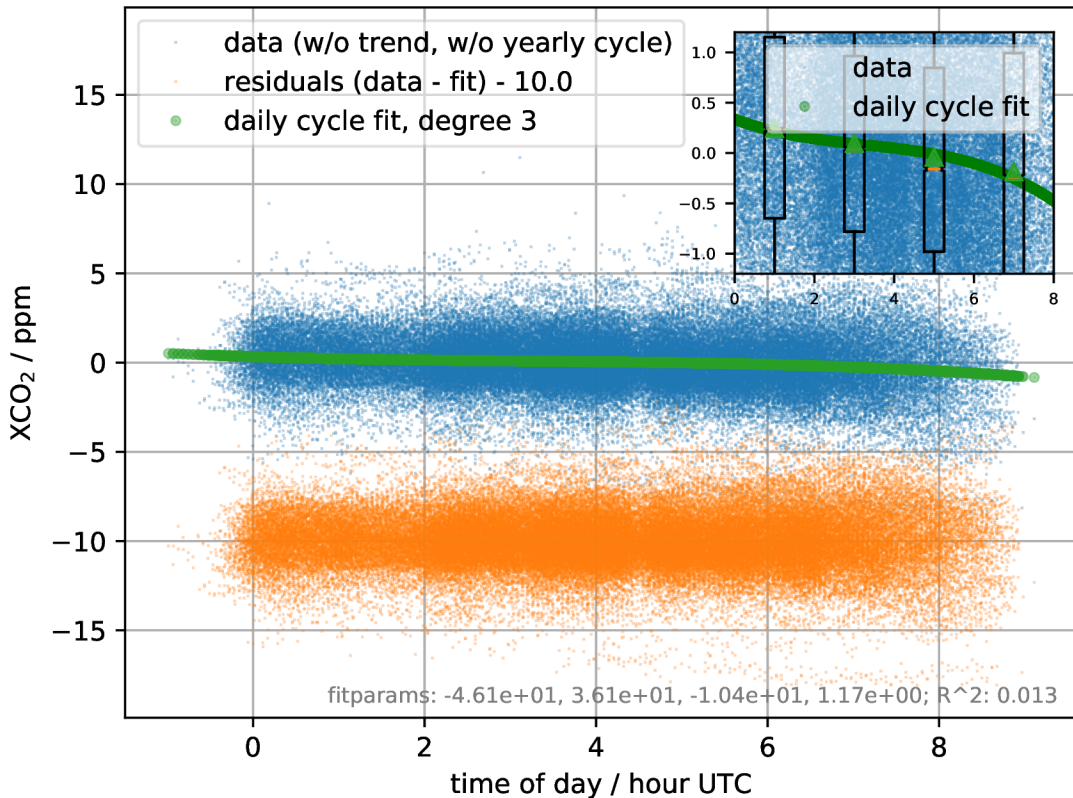

Supplement: Supplementary file 6 [file amt-13-2697-2020-supplement.zip]

Trend and average seasonal cycle in Tsukuba, Japan (tk)

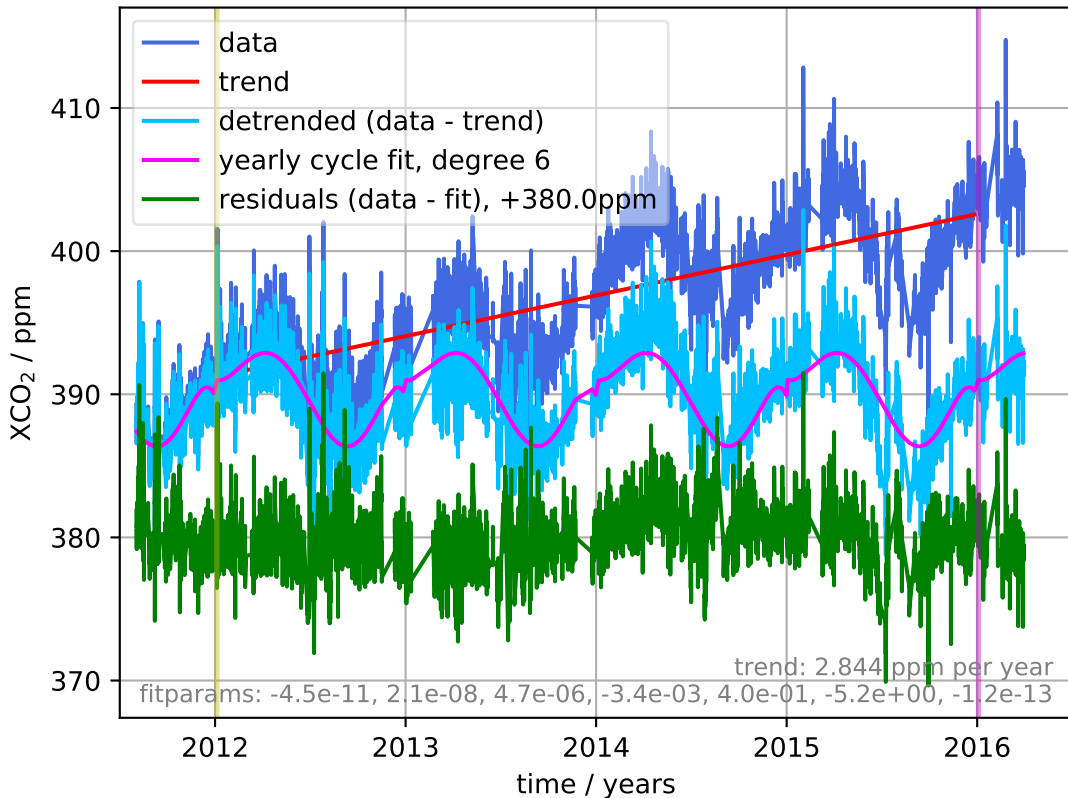

Supplement: Supplementary file 7 [file amt-13-2697-2020-supplement.zip]

Odiac emissions around Tokyo 2015-01

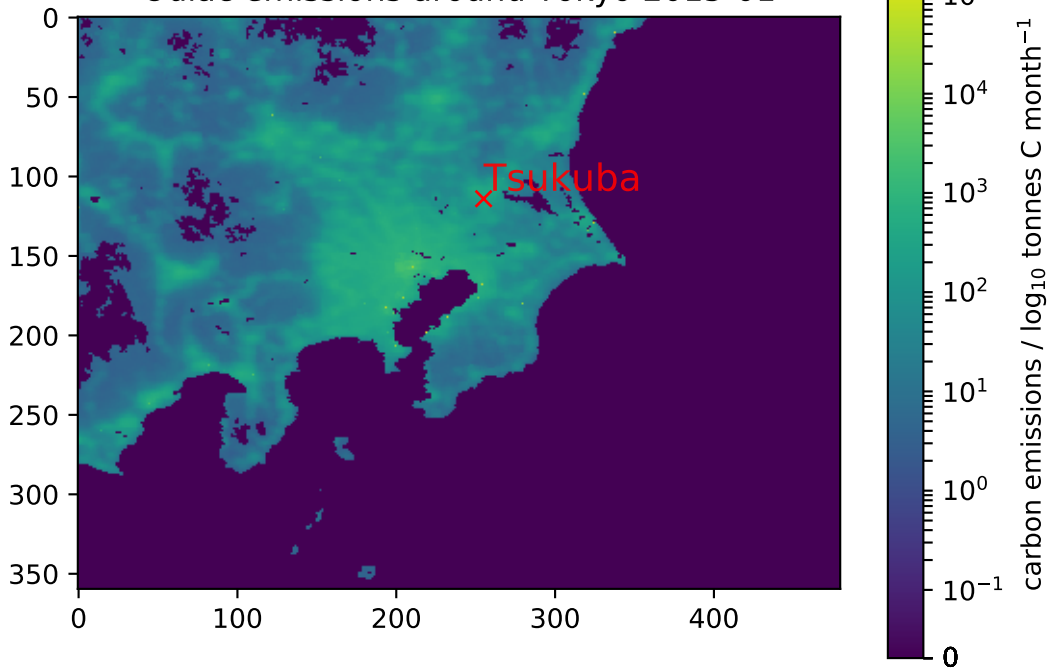

Supplement: Supplementary file 8 [file amt-13-2697-2020-supplement.zip]

Tsukuba,  $\bar{\Delta}=137.5\pm30.9\text{ g m}^{-1}\text{s}^{-1}$ ,  $5 < \text{wspd ms}^{-1} < 15$  | ccgfilt

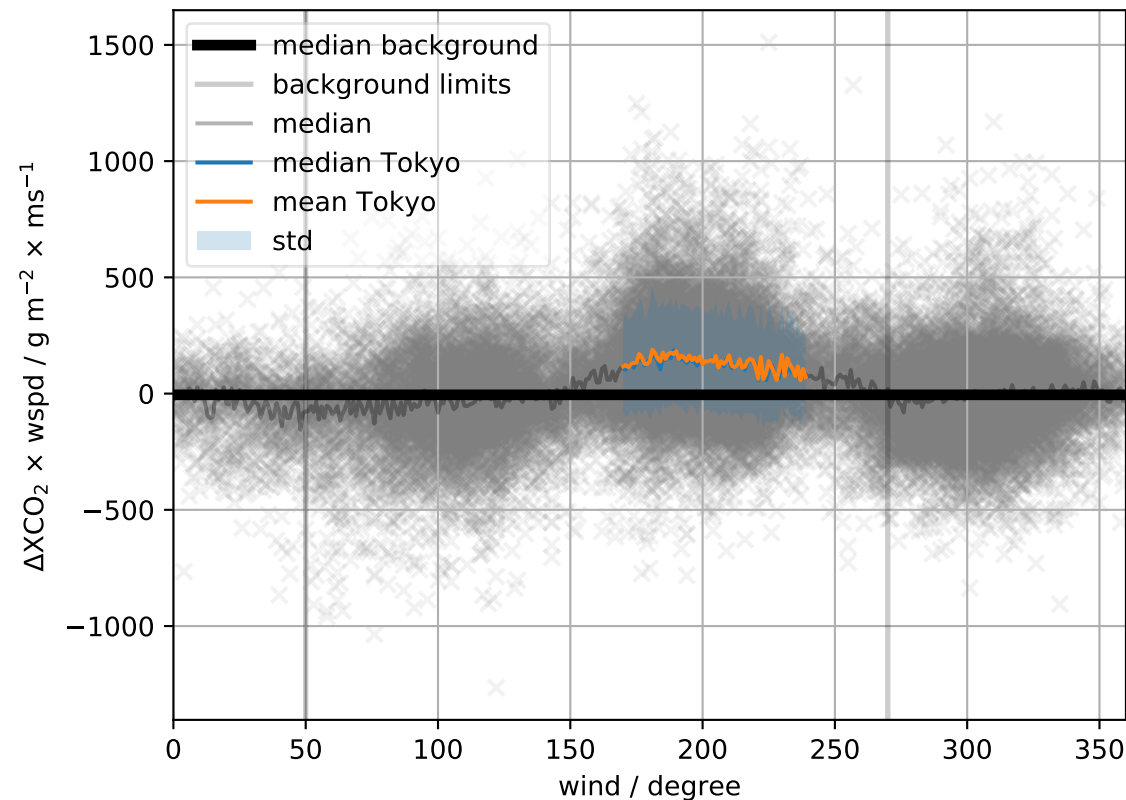

Supplement: Supplementary file 11 [file amt-13-2697-2020-supplement.zip]

Scaling ground wind speed to profile below 1000m

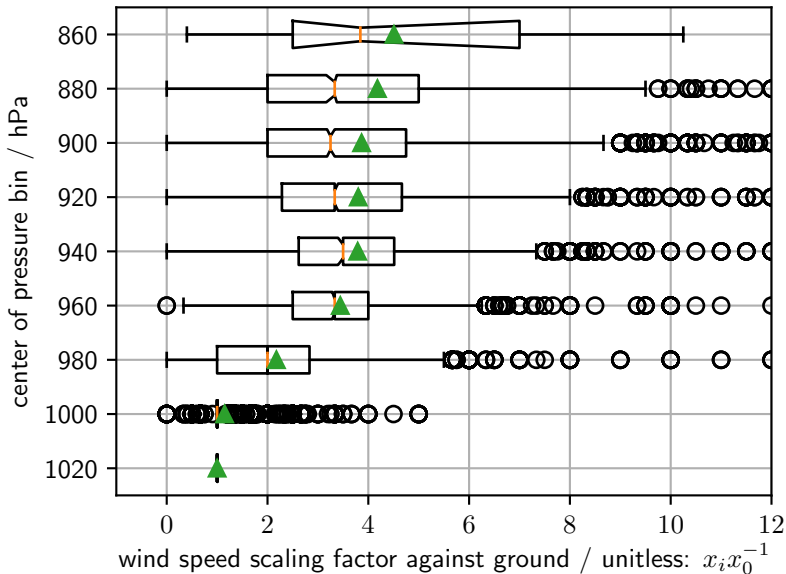

Supplement: Supplementary file 14 [file amt-13-2697-2020-supplement.zip]

wind direction vs. time of day in Tsukuba, Japan

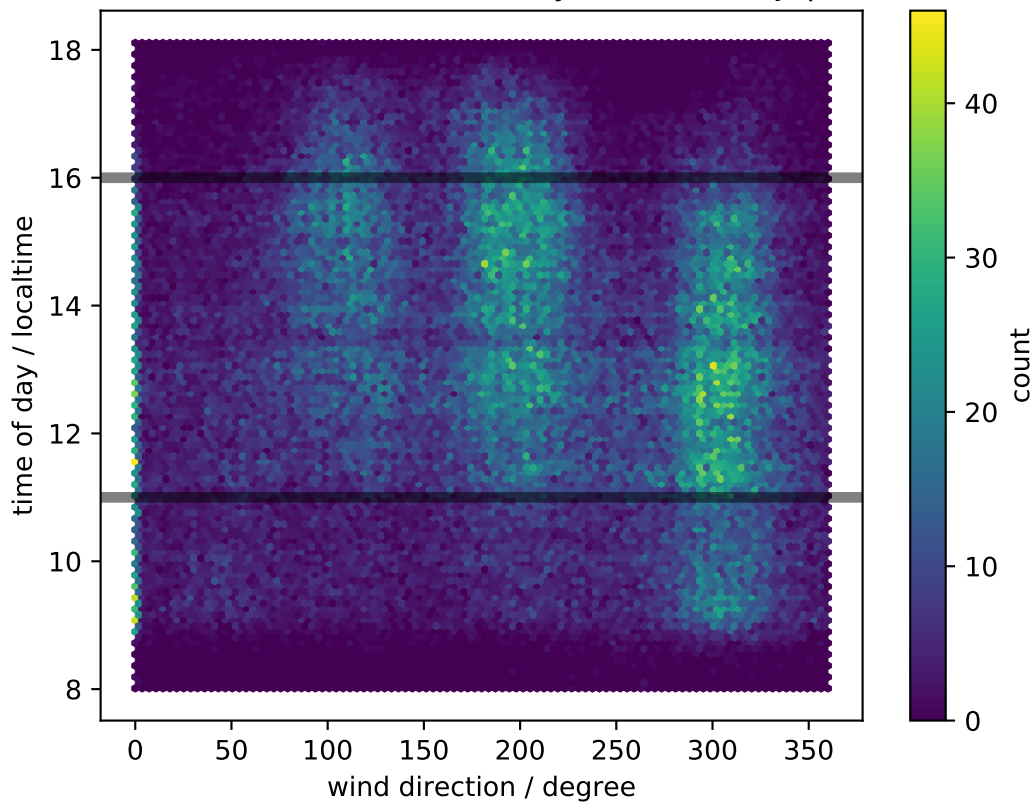

Supplement: Supplementary file 16 [file amt-13-2697-2020-supplement.zip]

NOAA HYSPLIT MODEL  
Forward trajectories starting at 0300 UTC 15 Jul 17  
GDAS Meteorological Data

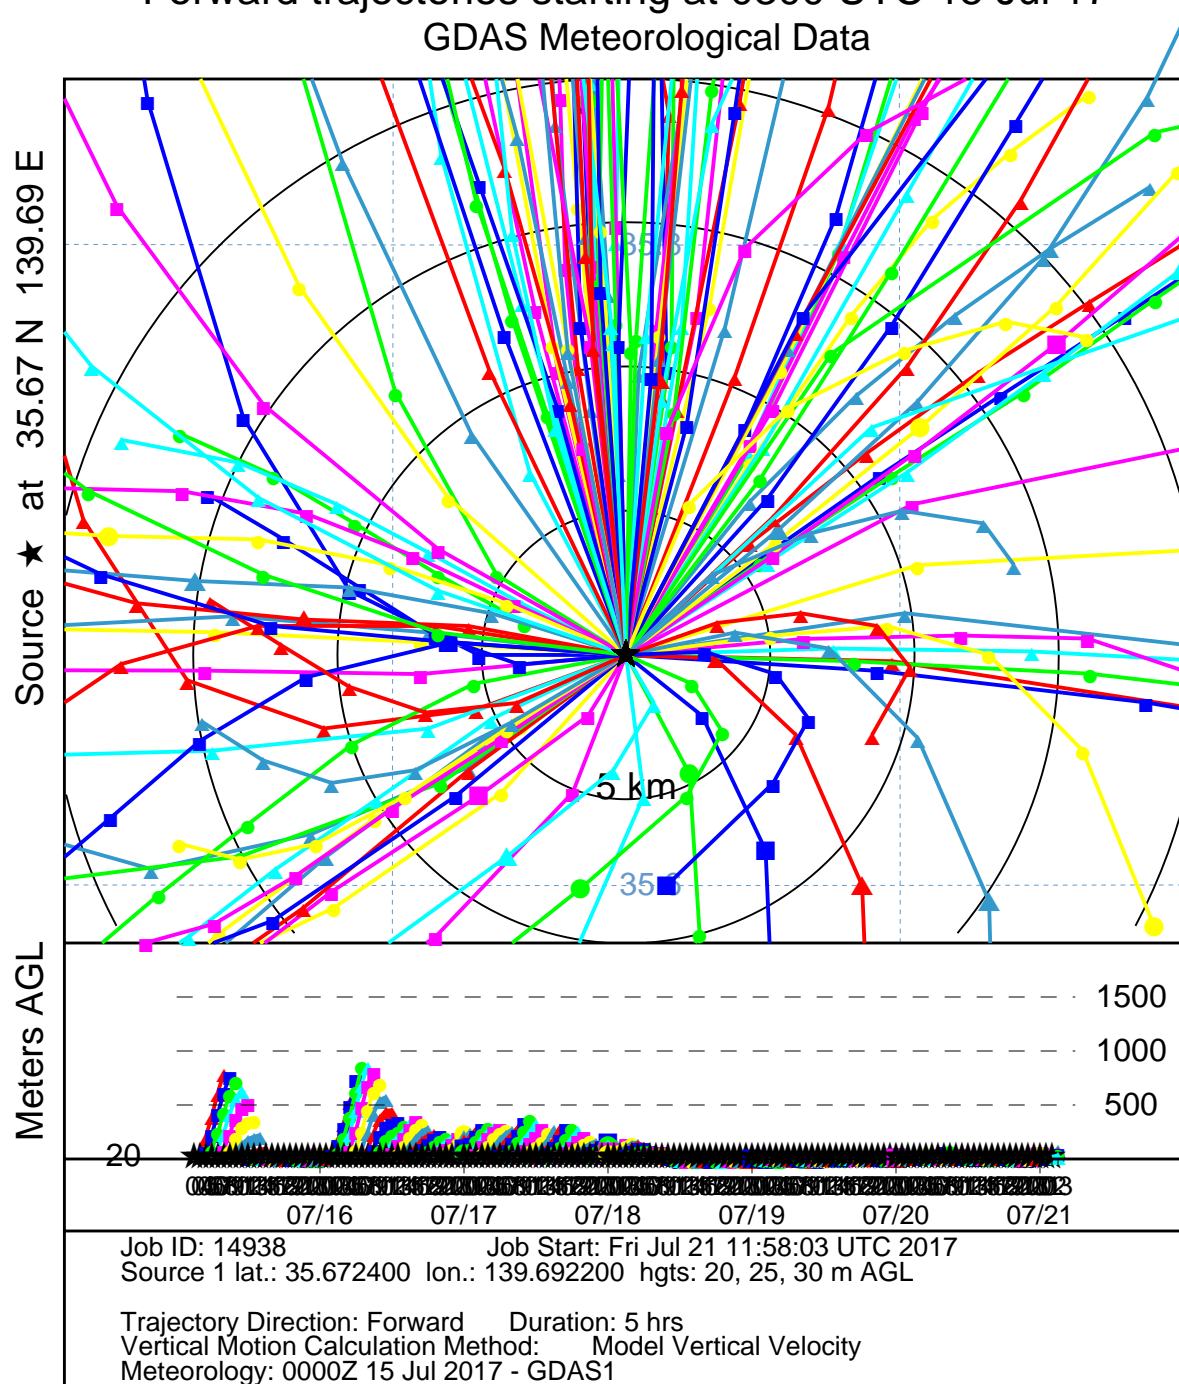

Supplement: Supplementary file 17 [file amt-13-2697-2020-supplement.zip]

Tsukuba,  $\bar{\Delta}=126.6\pm28.7\text{ g m}^{-1}\text{s}^{-1}$ ,  $5 < \text{wspd ms}^{-1} < 15$

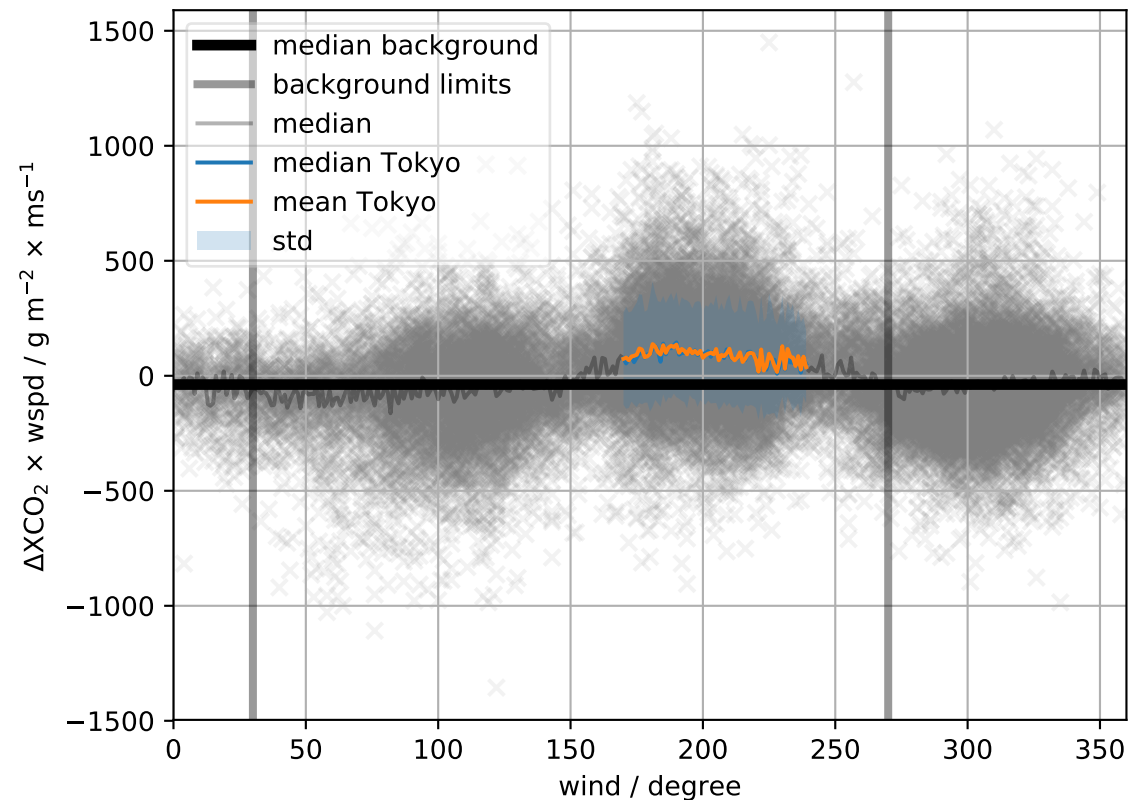

Supplement: Supplementary file 18 [file amt-13-2697-2020-supplement.zip]

Scaling ground wind speed to profile below 1000m

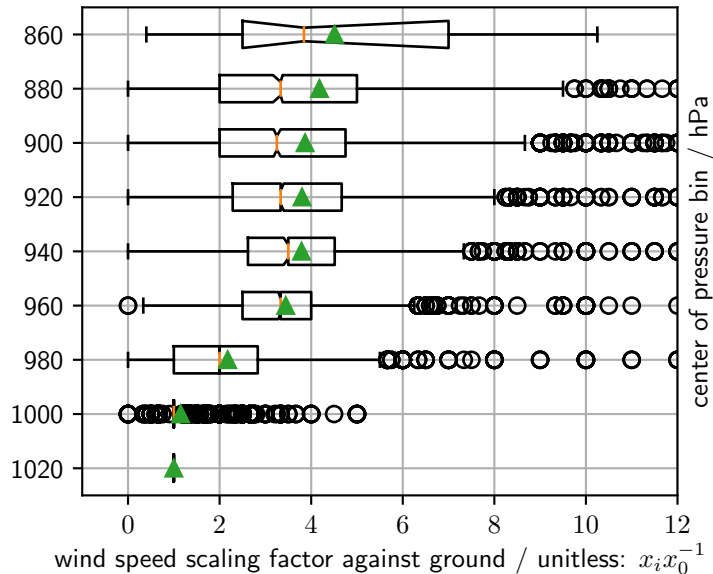

Change in wind direction to lowest level

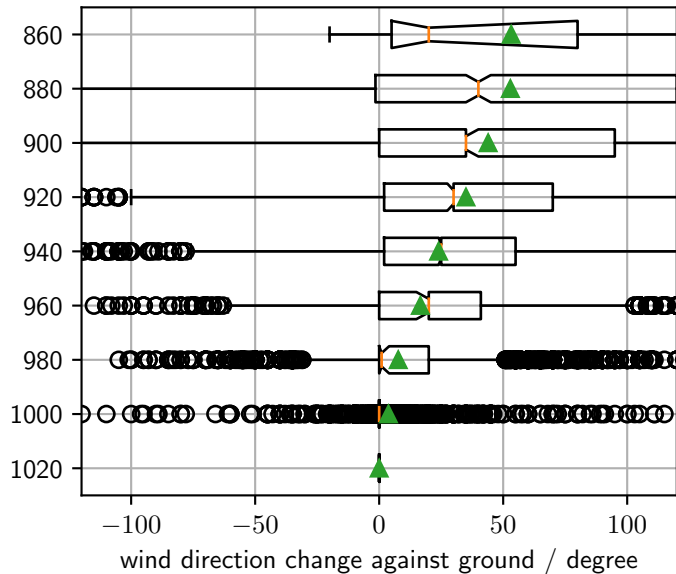

Supplement: Supplementary file 19 [file amt-13-2697-2020-supplement.zip]
